# Supplementary material
Source: PubMed Central journal article supplement (PMC4858327)
Supplement: NIHMS721895-supplement-Supplemental_Table_and_Appendix.pdf [file NIHMS721895-supplement-Supplemental_Table_and_Appendix.pdf]

## **SUPPLEMENTAL MATERIAL**

**Supplemental Table 1: Taxonomy classification**

**Appendix: Sample of VIRGO cases by class**

**Supplemental Table 1. Taxonomy classification.**

|                                  | Class        |            |            |            |            |            |            |
|----------------------------------|--------------|------------|------------|------------|------------|------------|------------|
|                                  | I            | IIa        | IIb        | IIIa       | IIIb       | IV         | V          |
| <b>Total n (%)</b>               | 2425 (86.5%) | 35 (1.2%)  | 55 (2.0%)  | 88 (3.1%)  | 150 (5.4%) | 31 (1.1%)  | 18 (0.6%)  |
| Sociodemographic characteristics |              |            |            |            |            |            |            |
| Females                          | 1564 (82.5%) | 27 (1.4%)  | 45 (2.4%)  | 81 (4.3%)  | 133 (7.0%) | 29 (1.5%)  | 16 (0.8%)  |
| Males                            | 861 (94.9%)  | 8 (0.9%)   | 10 (1.1%)  | 7 (0.8%)   | 17 (1.9%)  | 2 (0.2%)   | 2 (0.2%)   |
| Age (mean; SD)                   | 47.3 (6.0)   | 47.8 (5.3) | 47.3 (6.7) | 46.7 (6.1) | 45.0 (7.6) | 43.4 (7.7) | 47.6 (6.0) |
| Race                             |              |            |            |            |            |            |            |
| White/Caucasian                  | 1863 (77.0%) | 21 (60.0%) | 45 (81.8%) | 61 (69.3%) | 97 (64.7%) | 22 (71.0%) | 10 (55.6%) |
| Black/African American           | 417 (17.2%)  | 12 (34.3%) | 9 (16.4%)  | 23 (26.1%) | 37 (24.7%) | 7 (22.6%)  | 4 (22.2%)  |
| Other                            | 141 (5.8%)   | 2 (5.7%)   | 1 (1.8%)   | 4 (4.5%)   | 16 (10.7%) | 2 (6.5%)   | 4 (22.2%)  |
| Ethnicity                        |              |            |            |            |            |            |            |
| Hispanic                         | 175 (7.2%)   | 2 (5.7%)   | 7 (13.0%)  | 7 (8.1%)   | 18 (12.1%) | 2 (6.5%)   | 2 (11.1%)  |
| Marital status                   |              |            |            |            |            |            |            |
| Married/Co-habiting              | 1366 (56.4%) | 16 (45.7%) | 21 (38.2%) | 47 (53.4%) | 86 (57.7%) | 18 (58.1%) | 9 (50.0%)  |
| Divorced/Separated               | 632 (26.1%)  | 13 (37.1%) | 25 (45.5%) | 22 (25.0%) | 32 (21.5%) | 5 (16.1%)  | 4 (22.2%)  |
| Widowed                          | 75 (3.1%)    | 1 (2.9%)   | 1 (1.8%)   | 4 (4.5%)   | 3 (2.0%)   | 1 (3.2%)   | 0 (0.0%)   |
| Single                           | 331 (13.7%)  | 5 (14.3%)  | 7 (12.7%)  | 14 (15.9%) | 28 (18.8%) | 7 (22.6%)  | 5 (27.8%)  |
| Other                            | 17 (0.7%)    | 0 (0.0%)   | 1 (1.8%)   | 1 (1.1%)   | 0 (0.0%)   | 0 (0.0%)   | 0 (0.0%)   |
| Monthly financial situation      |              |            |            |            |            |            |            |
| Some money left over             | 715 (29.5%)  | 8 (22.9%)  | 15 (27.3%) | 26 (29.5%) | 40 (26.7%) | 11 (35.5%) | 4 (22.2%)  |
| Just enough to make ends meet    | 855 (35.3%)  | 9 (25.7%)  | 25 (45.5%) | 33 (37.5%) | 62 (41.3%) | 10 (32.3%) | 7 (38.9%)  |

|                                                  |              |            |            |            |             |            |            |
|--------------------------------------------------|--------------|------------|------------|------------|-------------|------------|------------|
| Not enough to make ends meet                     | 828 (34.2%)  | 18 (51.4%) | 14 (25.5%) | 28 (31.8%) | 45 (30.0%)  | 9 (29.0%)  | 7 (38.9%)  |
| Patient refused                                  | 25 (1.0%)    | 0 (0.0%)   | 1 (1.8%)   | 1 (1.1%)   | 3 (2.0%)    | 1 (3.2%)   | 0 (0.0%)   |
| Symptom presentation                             |              |            |            |            |             |            |            |
| Typical chest pain                               | 1886 (77.8%) | 22 (62.9%) | 40 (72.7%) | 56 (63.6%) | 116 (77.3%) | 25 (80.6%) | 11 (61.1%) |
| Atypical chest pain                              | 495 (20.4%)  | 10 (28.6%) | 14 (25.5%) | 18 (20.5%) | 27 (18.0%)  | 5 (16.1%)  | 6 (33.3%)  |
| Back pain                                        | 351 (14.5%)  | 3 (8.6%)   | 8 (14.5%)  | 16 (18.2%) | 20 (13.3%)  | 6 (19.4%)  | 5 (27.8%)  |
| Abdominal pain                                   | 119 (4.9%)   | 3 (8.6%)   | 1 (1.8%)   | 4 (4.5%)   | 7 (4.7%)    | 2 (6.5%)   | 1 (5.6%)   |
| Nausea                                           | 1084 (44.7%) | 11 (31.4%) | 24 (43.6%) | 24 (27.3%) | 64 (42.7%)  | 12 (38.7%) | 7 (38.9%)  |
| Other type/location of pain                      | 551 (22.7%)  | 8 (22.9%)  | 13 (23.6%) | 19 (21.6%) | 41 (27.3%)  | 9 (29.0%)  | 7 (38.9%)  |
| Shortness of breath                              | 1216 (50.1%) | 23 (65.7%) | 25 (45.5%) | 38 (43.2%) | 61 (40.7%)  | 13 (41.9%) | 5 (27.8%)  |
| Fatigue                                          | 270 (11.1%)  | 8 (22.9%)  | 5 (9.1%)   | 10 (11.4%) | 21 (14.0%)  | 4 (12.9%)  | 0 (0.0%)   |
| Other symptoms                                   | 1679 (69.2%) | 29 (82.9%) | 35 (63.6%) | 68 (77.3%) | 108 (72.0%) | 23 (74.2%) | 12 (66.7%) |
| Trigger                                          |              |            |            |            |             |            |            |
| Cocaine use                                      | 28 (1.2%)    | 1 (2.9%)   | 2 (3.6%)   | 2 (2.3%)   | 2 (1.3%)    | 0 (0.0%)   | 0 (0.0%)   |
| Other illicit drugs                              | 39 (1.6%)    | 1 (2.9%)   | 1 (1.8%)   | 3 (3.4%)   | 6 (4.0%)    | 1 (3.2%)   | 2 (11.1%)  |
| Discontinuation of previous antiplatelet therapy | 55 (2.3%)    | 1 (2.9%)   | 1 (1.8%)   | 1 (1.1%)   | 0 (0.0%)    | 0 (0.0%)   | 0 (0.0%)   |
| Sexual relations                                 | 11 (0.5%)    | 0 (0.0%)   | 0 (0.0%)   | 1 (1.1%)   | 1 (0.7%)    | 1 (3.2%)   | 0 (0.0%)   |
| Physical stress                                  | 242 (10.0%)  | 2 (5.7%)   | 3 (5.5%)   | 10 (11.4%) | 21 (14.0%)  | 4 (12.9%)  | 1 (5.6%)   |
| Mental stress                                    | 198 (8.2%)   | 4 (11.4%)  | 9 (16.4%)  | 12 (13.6%) | 21 (14.0%)  | 3 (9.7%)   | 4 (22.2%)  |
| Labor/postpartum                                 | 3 (0.1%)     | 1 (2.9%)   | 0 (0.0%)   | 0 (0.0%)   | 0 (0.0%)    | 2 (6.5%)   | 0 (0.0%)   |
| Other                                            | 173 (7.1%)   | 9 (25.7%)  | 3 (5.5%)   | 19 (21.6%) | 11 (7.3%)   | 5 (16.1%)  | 1 (5.6%)   |
| Blood pressure on arrival, mmHg                  |              |            |            |            |             |            |            |

|                                                |              |              |              |              |              |              |              |
|------------------------------------------------|--------------|--------------|--------------|--------------|--------------|--------------|--------------|
| First SBP - mean/SD                            | 145.4 (30.6) | 173.5 (36.3) | 143.8 (22.1) | 152.9 (37.1) | 134.9 (19.2) | 137.2 (18.4) | 144.7 (24.4) |
| First DBP - mean/SD                            | 87.5 (19.2)  | 98.5 (28.0)  | 83.0 (13.2)  | 93.9 (25.0)  | 79.2 (11.9)  | 86.2 (16.5)  | 87.2 (12.5)  |
| Killip Class on arrival                        |              |              |              |              |              |              |              |
| I (no rales)                                   | 2211 (92.5%) | 31 (91.2%)   | 53 (96.4%)   | 78 (90.7%)   | 133 (88.7%)  | 29 (93.5%)   | 17 (94.4%)   |
| II                                             | 59 (2.5%)    | 2 (5.9%)     | 0 (0.0%)     | 6 (7.0%)     | 8 (5.3%)     | 0 (0.0%)     | 0 (0.0%)     |
| III                                            | 20 (0.8%)    | 1 (2.9%)     | 0 (0.0%)     | 0 (0.0%)     | 1 (0.7%)     | 0 (0.0%)     | 0 (0.0%)     |
| IV                                             | 10 (0.4%)    | 0 (0.0%)     | 0 (0.0%)     | 0 (0.0%)     | 0 (0.0%)     | 0 (0.0%)     | 0 (0.0%)     |
| Unknown                                        | 89 (3.7%)    | 0 (0.0%)     | 2 (3.6%)     | 2 (2.3%)     | 8 (5.3%)     | 2 (6.5%)     | 1 (5.6%)     |
| Myocardial demand                              |              |              |              |              |              |              |              |
| Yes (%)                                        | 883 (37.1%)  | 34 (97.1%)   | 3 (5.6%)     | 85 (100.0%)  | 1 (0.7%)     | 12 (38.7%)   | 4 (23.5%)    |
| Severe hypertension (BP >180/100 mmHg)         | 244 (100.0%) | 16 (100.0%)  | 2 (100.0%)   | 18 (100.0%)  | 0 (0.0%)     | 1 (100.0%)   | 0 (0.0%)     |
| Severe hypertension (SBP <90 mmHg)             | 62 (2.6%)    | 1 (2.9%)     | 0 (0.0%)     | 6 (6.9%)     | 0 (0.0%)     | 0 (0.0%)     | 0 (0.0%)     |
| Heart rate >120 bpm                            | 91 (3.8%)    | 4 (11.4%)    | 0 (0.0%)     | 27 (30.7%)   | 0 (0.0%)     | 2 (6.5%)     | 0 (0.0%)     |
| Atrial fibrillation/flutter                    | 26 (1.1%)    | 2 (5.7%)     | 0 (0.0%)     | 1 (1.2%)     | 0 (0.0%)     | 1 (3.2%)     | 0 (0.0%)     |
| Ventricular fibrillation/tachycardia           | 2 (0.1%)     | 0 (0.0%)     | 0 (0.0%)     | 2 (2.4%)     | 0 (0.0%)     | 0 (0.0%)     | 0 (0.0%)     |
| Severe illness                                 | 48 (2.0%)    | 6 (17.1%)    | 0 (0.0%)     | 7 (8.0%)     | 0 (0.0%)     | 3 (9.7%)     | 1 (5.6%)     |
| Other                                          | 83 (3.4%)    | 8 (22.9%)    | 0 (0.0%)     | 18 (20.5%)   | 1 (0.7%)     | 1 (3.2%)     | 1 (5.6%)     |
| Baseline cardiovascular risk factors           |              |              |              |              |              |              |              |
| Family history of premature CAD (any relative) | 1816 (78.6%) | 28 (80.0%)   | 38 (73.1%)   | 62 (73.8%)   | 89 (64.0%)   | 22 (73.3%)   | 12 (75.0%)   |
| Hypertension                                   | 1620 (66.8%) | 32 (91.4%)   | 35 (63.6%)   | 55 (62.5%)   | 84 (56.0%)   | 16 (51.6%)   | 12 (66.7%)   |

|                                   |              |            |            |            |            |            |            |
|-----------------------------------|--------------|------------|------------|------------|------------|------------|------------|
| Dyslipidemia                      | 1255 (51.9%) | 21 (60.0%) | 31 (56.4%) | 34 (38.6%) | 63 (42.0%) | 12 (38.7%) | 10 (55.6%) |
| Smoker                            |              |            |            |            |            |            |            |
| Yes (%)                           | 1773 (73.2%) | 23 (65.7%) | 36 (65.5%) | 54 (61.4%) | 80 (53.3%) | 12 (38.7%) | 13 (72.2%) |
| No (%)                            | 650 (26.8%)  | 12 (34.3%) | 19 (34.5%) | 34 (38.6%) | 70 (46.7%) | 19 (61.3%) | 5 (27.8%)  |
| If Yes, type                      |              |            |            |            |            |            |            |
| Current (past month)              | 1407 (79.4%) | 15 (65.2%) | 29 (80.6%) | 41 (75.9%) | 45 (56.3%) | 8 (66.7%)  | 8 (61.5%)  |
| Past (last 1 month to 1 year)     | 76 (4.3%)    | 4 (17.4%)  | 2 (5.6%)   | 3 (5.6%)   | 1 (1.3%)   | 0 (0.0%)   | 0 (0.0%)   |
| Past (>1 year)                    | 265 (14.9%)  | 4 (17.4%)  | 5 (13.9%)  | 10 (18.5%) | 34 (42.5%) | 4 (33.3%)  | 5 (38.5%)  |
| Unknown                           | 25 (1.4%)    | 0 (0.0%)   | 0 (0.0%)   | 0 (0.0%)   | 0 (0.0%)   | 0 (0.0%)   | 0 (0.0%)   |
| Diabetes                          | 889 (36.7%)  | 19 (54.3%) | 21 (38.2%) | 27 (30.7%) | 31 (20.7%) | 5 (16.1%)  | 4 (22.2%)  |
| Obstructive sleep apnea           | 115 (4.8%)   | 3 (8.6%)   | 5 (9.3%)   | 9 (10.2%)  | 9 (6.0%)   | 0 (0.0%)   | 0 (0.0%)   |
| History of cocaine use            | 109 (4.5%)   | 2 (5.7%)   | 4 (7.3%)   | 7 (8.0%)   | 10 (6.7%)  | 1 (3.2%)   | 0 (0.0%)   |
| History of alcohol abuse          | 161 (6.7%)   | 2 (5.7%)   | 2 (3.6%)   | 10 (11.4%) | 12 (8.0%)  | 3 (9.7%)   | 0 (0.0%)   |
| History of other illicit drug use | 193 (8.0%)   | 4 (11.4%)  | 2 (3.6%)   | 12 (13.8%) | 17 (11.3%) | 3 (9.7%)   | 2 (11.1%)  |
| Hypercoagulability syndrome       | 30 (1.2%)    | 1 (2.9%)   | 1 (1.8%)   | 4 (4.5%)   | 3 (2.0%)   | 1 (3.2%)   | 1 (5.6%)   |
| Physical activity                 |              |            |            |            |            |            |            |
| Recommended                       | 851 (35.4%)  | 12 (35.3%) | 27 (49.1%) | 36 (41.4%) | 66 (44.0%) | 18 (58.1%) | 9 (50.0%)  |
| Insufficient                      | 722 (30.0%)  | 7 (20.6%)  | 11 (20.0%) | 18 (20.7%) | 39 (26.0%) | 4 (12.9%)  | 4 (22.2%)  |
| No activity                       | 831 (34.6%)  | 15 (44.1%) | 17 (30.9%) | 33 (37.9%) | 45 (30.0%) | 9 (29.0%)  | 5 (27.8%)  |
| Obesity                           | 1312 (54.1%) | 18 (51.4%) | 24 (43.6%) | 43 (48.9%) | 66 (44.0%) | 7 (22.6%)  | 8 (44.4%)  |
| Menopausal status (women)         |              |            |            |            |            |            |            |
| Yes                               | 854 (55.3%)  | 16 (59.3%) | 24 (53.3%) | 41 (51.3%) | 51 (39.2%) | 11 (37.9%) | 8 (50.0%)  |
| No                                | 691 (44.7%)  | 11 (40.7%) | 21 (46.7%) | 39 (48.8%) | 79 (60.8%) | 18 (62.1%) | 8 (50.0%)  |

|                                     |              |            |            |            |            |            |            |
|-------------------------------------|--------------|------------|------------|------------|------------|------------|------------|
| At-risk for CHD (self-report)       | 1369 (56.6%) | 26 (74.3%) | 36 (65.5%) | 48 (54.5%) | 62 (41.6%) | 14 (45.2%) | 11 (61.1%) |
| At-risk for CHD (doctor-report)     | 1198 (50.5%) | 26 (74.3%) | 33 (62.3%) | 40 (46.5%) | 55 (37.7%) | 13 (41.9%) | 9 (50.0%)  |
| Cardiovascular history              |              |            |            |            |            |            |            |
| Angina                              | 655 (27.0%)  | 16 (45.7%) | 21 (38.2%) | 17 (19.3%) | 30 (20.1%) | 9 (29.0%)  | 7 (38.9%)  |
| Myocardial infarction               | 403 (16.6%)  | 20 (57.1%) | 18 (32.7%) | 9 (10.2%)  | 16 (10.7%) | 4 (12.9%)  | 6 (33.3%)  |
| PCI                                 | 416 (17.2%)  | 12 (34.3%) | 12 (21.8%) | 5 (5.7%)   | 3 (2.0%)   | 4 (12.9%)  | 8 (44.4%)  |
| CABG                                | 88 (3.6%)    | 10 (28.6%) | 8 (14.5%)  | 0 (0.0%)   | 0 (0.0%)   | 0 (0.0%)   | 1 (5.6%)   |
| Stroke/transient ischemic attack    | 107 (4.4%)   | 6 (17.1%)  | 3 (5.5%)   | 4 (4.5%)   | 5 (3.3%)   | 1 (3.2%)   | 3 (16.7%)  |
| Congestive heart failure            | 102 (4.2%)   | 7 (20.0%)  | 6 (10.9%)  | 6 (6.8%)   | 5 (3.3%)   | 2 (6.5%)   | 1 (5.6%)   |
| Peripheral artery disease           | 62 (2.6%)    | 3 (8.6%)   | 3 (5.5%)   | 0 (0.0%)   | 0 (0.0%)   | 0 (0.0%)   | 0 (0.0%)   |
| Non-cardiac history                 |              |            |            |            |            |            |            |
| Chronic renal failure               | 255 (10.6%)  | 11 (31.4%) | 8 (15.1%)  | 11 (12.5%) | 14 (9.4%)  | 2 (6.5%)   | 1 (5.6%)   |
| Lung disease                        | 263 (10.9%)  | 6 (17.6%)  | 15 (27.3%) | 17 (19.3%) | 21 (14.0%) | 3 (9.7%)   | 2 (11.1%)  |
| Depression                          | 963 (39.7%)  | 18 (51.4%) | 30 (54.5%) | 42 (47.7%) | 66 (44.0%) | 16 (51.6%) | 8 (44.4%)  |
| Venous thromboembolism              | 62 (2.6%)    | 2 (5.7%)   | 1 (1.8%)   | 3 (3.4%)   | 5 (3.3%)   | 2 (6.5%)   | 1 (5.6%)   |
| Cancer                              | 78 (3.2%)    | 1 (2.9%)   | 3 (5.5%)   | 6 (6.8%)   | 4 (2.7%)   | 1 (3.2%)   | 1 (5.6%)   |
| Chronic viral syndrome              | 28 (1.2%)    | 0 (0.0%)   | 1 (1.8%)   | 0 (0.0%)   | 1 (0.7%)   | 0 (0.0%)   | 1 (5.6%)   |
| Autoimmune disease                  | 74 (3.1%)    | 0 (0.0%)   | 0 (0.0%)   | 3 (3.4%)   | 7 (4.7%)   | 1 (3.2%)   | 1 (5.6%)   |
| Thyroid disease                     | 167 (6.9%)   | 0 (0.0%)   | 4 (7.3%)   | 5 (5.7%)   | 19 (12.7%) | 2 (6.5%)   | 1 (5.6%)   |
| Major psychiatric diagnosis         | 109 (4.5%)   | 3 (8.6%)   | 1 (1.8%)   | 1 (1.1%)   | 12 (8.0%)  | 3 (9.7%)   | 0 (0.0%)   |
| Polycystic ovarian syndrome (women) | 12 (0.8%)    | 0 (0.0%)   | 1 (2.2%)   | 0 (0.0%)   | 1 (0.8%)   | 0 (0.0%)   | 0 (0.0%)   |

Baseline health status

|                                                   |                  |                  |                  |                  |                  |                  |                  |
|---------------------------------------------------|------------------|------------------|------------------|------------------|------------------|------------------|------------------|
| SF-12, mean (SD)                                  |                  |                  |                  |                  |                  |                  |                  |
| Physical component summary                        | 42.8 (12.0)      | 35.5 (13.6)      | 41.5 (12.7)      | 43.8 (12.0)      | 46.5 (12.7)      | 49.4 (8.7)       | 49.1 (9.9)       |
| Mental component summary                          | 45.6 (12.3)      | 41.9 (12.3)      | 46.8 (11.9)      | 45.4 (13.6)      | 44.1 (13.1)      | 46.9 (15.3)      | 43.4 (13.6)      |
| Seattle Angina Questionnaire,<br>median (IQR)     |                  |                  |                  |                  |                  |                  |                  |
| Physical limitation                               | 94.4 (66.7-100)  | 75.0 (33.3-100)  | 90.3 (73.6-100)  | 91.7 (58.3-100)  | 100 (83.3-100)   | 100 (84.7-100)   | 100 (75.0-100)   |
| Angina frequency                                  | 90.0 (70.0-100)  | 80.0 (70.0-100)  | 90.0 (70.0-100)  | 90.0 (80.0-100)  | 100 (80.0-100)   | 90.0 (80.0-100)  | 90.0 (80.0-100)  |
| Treatment satisfaction                            | 100 (87.5-100)   | 93.8 (75.0-100)  | 93.8 (81.3 -100) | 100 (81.3-100)   | 93.8 (81.3-100)  | 100 (81.3-100)   | 93.8 (75.0-100)  |
| Quality of life                                   | 58.3 (41.7-75.0) | 41.7 (25.0-75.0) | 50.0 (33.3-66.7) | 58.3 (41.7-83.3) | 58.3 (41.7-75.0) | 58.3 (50.0-75.0) | 58.3 (41.7-83.3) |
| Stress scale (PSS-I), mean<br>(SD)                | 25.9 (9.8)       | 27.9 (10.4)      | 27.0 (10.9)      | 25.4 (9.4)       | 27.3 (9.9)       | 26.5 (9.3)       | 29.9 (9.0)       |
| Troponin                                          |                  |                  |                  |                  |                  |                  |                  |
| Maximum troponin (mean,<br>SD)                    | 28.6 (57.0)      | 4.5 (5.5)        | 10.3 (18.9)      | 7.6 (27.3)       | 6.8 (11.3)       | 17.5 (17.5)      | 11.1 (14.3)      |
| Reperfusion therapy                               |                  |                  |                  |                  |                  |                  |                  |
| *Criteria for primary<br>reperfusion met, Yes (%) | 1168 (48.2%)     | 1 (2.9%)         | 2 (3.6%)         | 6 (6.9%)         | 9 (6.0%)         | 7 (22.6%)        | 1 (5.6%)         |
| PCI, Yes (%)                                      | 1092 (93.5%)     | NA               | NA               | NA               | NA               | NA               | NA               |
| Echocardiogram                                    |                  |                  |                  |                  |                  |                  |                  |
| Obtained, Yes (%)                                 | 1639 (67.8%)     | 24 (68.6%)       | 34 (61.8%)       | 68 (77.3%)       | 114 (76.0%)      | 27 (87.1%)       | 14 (77.8%)       |
| If LV systolic function documented                |                  |                  |                  |                  |                  |                  |                  |
| ≥55%                                              | 790 (50.0%)      | 10 (47.6%)       | 19 (55.9%)       | 39 (60.9%)       | 77 (70.0%)       | 14 (56.0%)       | 9 (64.3%)        |
| 45-54%                                            | 404 (25.6%)      | 5 (23.8%)        | 8 (23.5%)        | 13 (20.3%)       | 17 (15.5%)       | 7 (28.0%)        | 2 (14.3%)        |

|                             |              |             |            |            |             |             |             |
|-----------------------------|--------------|-------------|------------|------------|-------------|-------------|-------------|
| 35-44%                      | 242 (15.3%)  | 2 (9.5%)    | 5 (14.7%)  | 6 (9.4%)   | 12 (10.9%)  | 3 (12.0%)   | 3 (21.4%)   |
| <35%                        | 145 (9.2%)   | 4 (19.0%)   | 2 (5.9%)   | 6 (9.4%)   | 4 (3.6%)    | 1 (4.0%)    | 0 (0.0%)    |
| Physician's final diagnosis |              |             |            |            |             |             |             |
| NSTEMI                      | 1128 (46.5%) | 29 (82.9%)  | 49 (89.1%) | 75 (85.2%) | 128 (85.3%) | 24 (77.4%)  | 15 (83.3%)  |
| STEMI                       | 1297 (53.5%) | 6 (17.1%)   | 6 (10.9%)  | 13 (14.8%) | 22 (14.7%)  | 7 (22.6%)   | 3 (16.7%)   |
| Aspirin on arrival          |              |             |            |            |             |             |             |
| Yes                         | 2344 (97.4%) | 34 (97.1%)  | 54 (98.2%) | 83 (98.8%) | 142 (95.9%) | 31 (100.0%) | 18 (100.0%) |
| Medications at discharge    |              |             |            |            |             |             |             |
| Aspirin                     | 2368 (98.8%) | 34 (97.1%)  | 51 (94.4%) | 73 (90.1%) | 131 (91.6%) | 30 (100.0%) | 18 (100.0%) |
| Oral antiplatelet           | 2099 (88.5%) | 25 (75.8%)  | 30 (56.6%) | 24 (31.2%) | 49 (36.0%)  | 18 (62.1%)  | 11 (64.7%)  |
| Beta-blocker                | 2275 (98.5%) | 32 (97.0%)  | 45 (88.2%) | 66 (86.8%) | 101 (83.5%) | 20 (83.3%)  | 14 (93.3%)  |
| ACE inhibitor/ARB           | 1607 (73.4%) | 25 (78.1%)  | 34 (66.7%) | 44 (54.3%) | 58 (44.3%)  | 13 (48.1%)  | 9 (50.0%)   |
| Lipid-lowering medication   | 2303 (96.8%) | 34 (100.0%) | 46 (86.8%) | 62 (75.6%) | 91 (66.9%)  | 23 (85.2%)  | 17 (100.0%) |
| 1-year mortality            |              |             |            |            |             |             |             |
| Overall                     | 53 (2.2%)    | 1 (3.0%)    | 1 (1.9%)   | 2 (2.4%)   | 1 (0.7%)    | 2 (6.9%)    | 0 (0.0%)    |
| Women                       | 40 (2.6%)    | 1 (4.0%)    | 1 (2.3%)   | 2 (2.6%)   | 1 (0.8%)    | 2 (7.4%)    | 0 (0.0%)    |
| Men                         | 13 (1.5%)    | 0 (0.0%)    | 0 (0.0%)   | 0 (0.0%)   | 0 (0.0%)    | 0 (0.0%)    | 0 (0.0%)    |

\*Criteria for reperfusion: chest pain >30 minutes, but >12 hours AND, ST elevation >1mm in  $\geq 2$  consecutive leads or new left bundle branch block

ACE, angiotensin-converting enzyme; ARB, angiotensin-receptor blocker; CABG, coronary artery bypass graft surgery; CAD, coronary artery disease; CHD, congestive heart disease; DBP, diastolic blood pressure; IQR, interquartile range; LV, left ventricular; NSTEMI, non-ST-elevation myocardial infarction; PCI, percutaneous coronary intervention; PSS-I, Posttraumatic symptom scale; SBP, systolic blood pressure; SD, standard deviation; SF-12, 12-Item Short Form Health Survey; STEMI, ST-elevation myocardial infarction



**Appendix 1. Classification by VIRGO Taxonomy and Third Universal Definition of MI with Case Examples**

|                                                                                                                    | VIRGO Taxonomy | Universal Definition | Clinical Scenarios                                                                                                                                                                                                                                                                    |
|--------------------------------------------------------------------------------------------------------------------|----------------|----------------------|---------------------------------------------------------------------------------------------------------------------------------------------------------------------------------------------------------------------------------------------------------------------------------------|
| <b>Culprit Lesion: Acute occlusion of a (major) epicardial vessel</b>                                              |                |                      |                                                                                                                                                                                                                                                                                       |
| Case 1                                                                                                             | 1              | 1                    | 41 y F, migraines and + family history, p/w migraine and chest pain. AWSTEMI; LAD totally occluded s/p PCI; no other significant disease. EF 25% to 55%.                                                                                                                              |
| Case 2                                                                                                             | 1              | 1                    | 53 y F, HTN, HL, CKD, p/w chest pain and hypertensive crisis. BP 233/166. IWSTEMI; LCX 90% occluded; OM2 100% occluded s/p PCI and 100% LAD stenosis with recanalization, s/p staged PCI.                                                                                             |
| Case 3                                                                                                             | 1              | 1                    | 50 y M, psoriasis and + family history, p/w crushing CP; NSTEMI; LAD with sequential 95% lesions - s/p PCI; no other significant disease                                                                                                                                              |
| Case 4                                                                                                             | 1              | 1                    | 54 y F, smoker, p/w chest pain. IWSTEMI; posterior LAD with 80% ulcerated lesion - s/p PCI. Mid-RCA 60-70%; no other significant disease                                                                                                                                              |
| Case 5                                                                                                             | 1              | 1                    | 49 y F, smoker, with hyperlipidemia and anxiety, p/w 2 weeks of intermittent chest pain and dyspnea. IWSTEMI with 3rd degree heart block. RCA 100% occluded - s/p PCI; no other disease                                                                                               |
| <b>Obstructive CAD (≥50% stenosis) with evidence supporting myocardial oxygen supply-demand mismatch</b>           |                |                      |                                                                                                                                                                                                                                                                                       |
| Case 6                                                                                                             | 2a             | 2                    | 55 y F, DM, HTN, obesity p/w chest pain and severe hypertension. BP 190/112; NSTEMI with dynamic ECG; 2V non-significant disease (RCA 40-65%; LAD with 60-70% lesions); no culprit; medically managed                                                                                 |
| Case 7                                                                                                             | 2a             | 2                    | 47 y F, HTN, seizures, cocaine and heroine abuse, p/w chest pain, dyspnea and diaphoresis. BP 142/110, p. 114. NSTEMI. Single vessel disease with CTO of RCA; medically managed                                                                                                       |
| Case 8                                                                                                             | 2a             | 2                    | 48 y F, smoker, migraines and + family history, p/w chest pain. BP 187/94. NSTEMI with dynamic ECG. PDA 50-60% - no response to IC nitroglycerin. OM1 30% stenosis. Dyskinesia in inferoapical wall; medically managed                                                                |
| Case 9                                                                                                             | 2a             | 2                    | 54 y F, DM, HTN, prior stroke, p/w chest pain and severe HTN. BP 173/127. NSTEMI; branch of ramus 80% stenosed; LAD tortuous with 30% lesion; RCA tortuous. LVEF 35% w/ large anteroapical aneurysm                                                                                   |
| Case 10                                                                                                            | 2a             | 2                    | 38 y F, smoker, HTN, HL, CKD and CAD-prior PCI 9 days prior; p/w severe chest pain and BP 181/116. NSTEMI with dynamic ECG; Patent stent in LCX. Unchanged 50% LAD; Unchanged 70% Ramus                                                                                               |
| <b>Obstructive CAD (≥50% stenosis) without evidence supporting myocardial oxygen supply-demand mismatch</b>        |                |                      |                                                                                                                                                                                                                                                                                       |
| Case 11                                                                                                            | 2b             | 2/Unclassified       | 48 y M, smoker, polysubstance use, p/w chest pain. NSTEMI; cath with multivessel disease. Left main 50%; Diagonal 75%; LCX diffuse disease; RCA with CTO. Normal LV systolic function                                                                                                 |
| Case 12                                                                                                            | 2b             | Unclassified         | 44 y F, smoker, p/w CP. NSTEMI; distal LAD 60% stenoses, otherwise minor luminal irregularities. ECHO with severe apical hypokinesia                                                                                                                                                  |
| Case 13                                                                                                            | 2b             | Unclassified         | 54 y F, HTN, p/w chest pain while carrying grandchild on beach. NSTEMI; ostial D1 lesion 50% stenosed; otherwise normal coronary arteries. ADD ECHO                                                                                                                                   |
| Case 14                                                                                                            | 2b             | Unclassified         | 53 y F, fibromyalgia, p/w crushing chest pain. Husband critically ill in ICU. NSTEMI. Cath 40% ostial LM; RPL 60%; otherwise luminal irregularities. ADD ECHO                                                                                                                         |
| Case 15                                                                                                            | 2b             | Unclassified         | 34 y F, CAD - s/p AMI and PCI; p/w chest pain. NSTEMI. Stress test: large anterolateral anterior defect, partially reversible. Cath with 50% in-stent restenosis of LAD; pOM1 80% lesion; pRCA 60%; medically managed.                                                                |
| <b>Non-obstructive CAD (&lt;50% stenosis) with evidence supporting myocardial oxygen supply-demand mismatch</b>    |                |                      |                                                                                                                                                                                                                                                                                       |
| Case 16                                                                                                            | 3a             | 2                    | 52 y F, COPD, fibromyalgia, seizures p/w altered mental status, pneumonia, COPD exac. NSTEMI; LAD 30% hazy lesion; RCA 40% eccentric lesion. Neither considered culprit. ECHO with RV failure                                                                                         |
| Case 17                                                                                                            | 3a             | 2                    | 44 y F, HTN, DM, h/o pulmonary embolism, obesity, p/w chest pain and dyspnea with exertion. BP 200s systolic. NSTEMI. Cath with minimal disease. Hypokinesia of basal inferior wall, NI LVEF                                                                                          |
| Case 18                                                                                                            | 3a             | 2                    | 54 y M, COPD, p/w respiratory failure requiring intubation, fever, BP 187/108, p. 144. Cath with minimal stenosis of AV groove; otherwise normal. LVEF 30% with septal and lateral wall motion abnormalities                                                                          |
| Case 19                                                                                                            | 3a             | 2                    | 38 y F, morbid obesity, + family history, p/w back pain radiating to chest. BP 151/105, p. 121. NSTEMI. Cath 30% RCA, mild anterior hypokinesia                                                                                                                                       |
| Case 20                                                                                                            | 3a             | 2                    | 36 y F, smoker, HTN, HL, DM with chest pain x 20 years; now worse. BP 170/111. Stress test: chest pain, no ECG changes, but with rising troponins. NSTEMI. Cath with 20% LAD lesion, otherwise normal. ECHO with LVH and normal LVEF                                                  |
| <b>Non-obstructive CAD (&lt;50% stenosis) without evidence supporting myocardial oxygen supply-demand mismatch</b> |                |                      |                                                                                                                                                                                                                                                                                       |
| Case 21                                                                                                            | 3b             | Unclassified         | 26 y F, with h/o gestational HTN, p/w chest pain that awoke her from sleep at 5am. NSTEMI. No evidence of pulmonary embolism. Normal coronaries. ADD ECHO. Rheumatologic evaluation negative. Thrombilia eval pending at time of discharge.                                           |
| Case 22                                                                                                            | 3b             | Unclassified         | 54 y F, with + family history, p/w chest pain while on treadmill. NSTEMI. Normal coronaries. Distal inferior hypokinesia. Empirically treated for vasospasm                                                                                                                           |
| Case 23                                                                                                            | 3b             | Unclassified         | 48 y F, smoker, p/w fever, chills, vomiting. ECG with bigeminy. NSTEMI. Normal coronaries. Normal LVEF with mild inferior hypokinesia                                                                                                                                                 |
| Case 24                                                                                                            | 3b             | Unclassified         | 37 y F, with obesity, chronic back pain, + family history, p/w chest and back pain. NSTEMI. Normal coronaries. Normal LV systolic function                                                                                                                                            |
| Case 25                                                                                                            | 3b             | Unclassified         | 51 y F, HTN, HL, p/w chest pain in setting of witnessing natural disaster. NSTEMI. Normal coronaries. LV gram EF 25%; aknesis of anterior and inferior walls small portion of apex contracting normally                                                                               |
| <b>Other discrete pathophysiologic mechanism (e.g., Vasospasm, Dissection; Embolism; Takotsubo)</b>                |                |                      |                                                                                                                                                                                                                                                                                       |
| Case 26                                                                                                            | 4 - Dissection | 1                    | 41 y F, marathon runner, p/w chest pain at rest. NSTEMI. Spontaneous dissection of 1st OM and 2nd OM arteries with 90% and 100% stenosis, respectively; otherwise normal. NI LVEF with inferior hypokinesia. Medically managed                                                        |
| Case 27                                                                                                            | 4 - Vasospasm  | 2                    | 50 y F, smoker, + family history, p/w chest pain. AWSTEMI. Initial cath with ostial 90% LAD and 75-50% LCX. Spasm of b/l femoral arteries prevented PCI. 2nd cath with mild disease that responded to IC nitro. LVEF 39% with global hypokinesia                                      |
| Case 28                                                                                                            | 4 - Vasospasm  | 2                    | 52 y F, anxiety, panic attacks, TIA symptoms, p/w chest pain after learning of child's death; ECG: diffuse ST depressions; LAD tubular stenosis improved with IC nitro; LV gram EF 35-40%; f/u ECHO with normal LVEF                                                                  |
| Case 29                                                                                                            | 4 - Vasospasm  | 2                    | 47 y F, HTN, p/w chest pain while walking. ECG with bigeminy. NSTEMI. Mid-LAD 50% stenosis relieved with IC nitro; otherwise normal coronaries. LVEF 35-40% with anterior and apical hypokinesia. F/U ECHO with EF 45-50%                                                             |
| Case 30                                                                                                            | 4 - Dissection | 1                    | 52 y F, DM, HTN, CAD - s/p PCI, p/w chest pain and vomiting. Found to be in DKA. IWSTEMI. Cath with dissection of RPL (otherwise no different than prior cath 3 months ago). LVEF 55% with inferior hypokinesia                                                                       |
| <b>Undetermined: Presentation fits into 2 or more classes above, depending on interpretation of description</b>    |                |                      |                                                                                                                                                                                                                                                                                       |
| Case 31                                                                                                            | 5              | 1/Unclassified       | 50 y F, p/w chest pain x 2 days following death of friend. NSTEMI. LAD 40% with distal staining concerning for recent plaque rupture. ECHO LVEF 20-25%; hypokinesia of midseptum; mid anterolateral and basal anterior and inferior walls. Apex n                                     |
| Case 32                                                                                                            | 5              | 1/Unclassified       | 49 y F, DM, HTN, HL, + family hx p/w chest pain. NSTEMI. Normal coronaries except for possible D1 hazy lesion; Medical team uncertain of this being the culprit. Normal LV systolic function                                                                                          |
| Case 33                                                                                                            | 5              | 1/Unclassified       | 38 y M, smoker, p/w chest pain. IWSTEMI with associated q waves. Cath within 6 hours of pain onset. Coronaries normal except late filling of extreme distal portion of superior division of 1st OM. LV gram with mild hypokinesia of inferior wall. EF 60%. "Possible culprit"        |
| Case 34                                                                                                            | 5              | 1/Unclassified       | 37 y F, p/w chest pain > 1day. AWSTEMI. Distal LAD very small lumen that "tailed off" with faint collaterals; possibly occluded; otherwise normal coronaries. ECHO mid-septal/anteroseptal/anterior and apical septal/anterior/inferior akinesia EF 35-40%                            |
| Case 35                                                                                                            | 5              | 1/Unclassified       | 52 y F, Asian, breast cancer, borderline HTN p/w chest pain. EKG: intermittent BBB. Distal LAD with sudden tapering into hair-like vessels; diffusely diseased and subtotally occluded; LCX and RCA also with terminal portions that are small and tortuous. Apical dyskinesia EF 50% |
